# Supplementary material
Source: Springer Nature journal article supplement (https://www.springermedizin.de/resource/supplementary/12865_2008_238_MOESM6_ESM.pdf/9427572)

**Up (> 1.9 fold)****A**

PMA 24

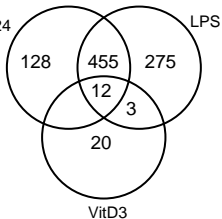**Down (< -2 fold)****B**

PMA 24

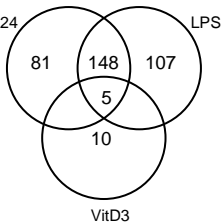**C**

PMA 6

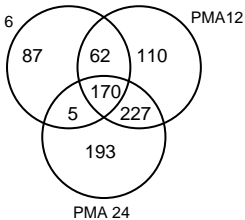**D**

PMA 6

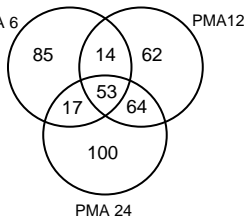

Supplement: MOESM6 [file 9427572]
